# Supplementary material for: A Role for Peripheral Anandamide and 2-Arachidonoylglycerol in Short-Term Food Intake and Orexigenic Hypothalamic Responses in a Species with Continuous Nutrient Delivery
Source: MDPI journal article supplement (doi:10.3390/nu13103587), 2021-10-13
Supplement: s1 [file s1]

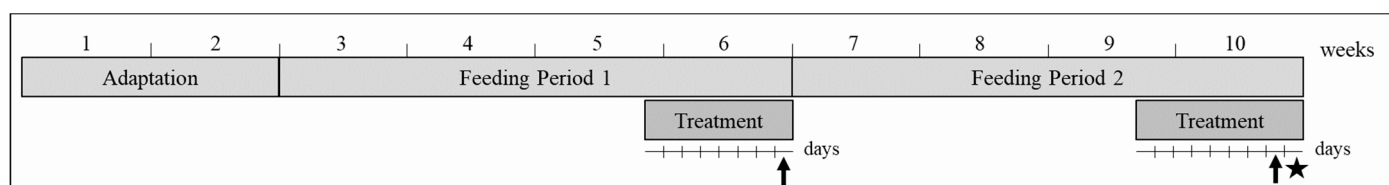

**Figure S1.** Study design, experiment 1. Animals were fed a grass silage (GS) and corn silage (CS) based diet (ad libitum) in a cross over design in feeding period 1 and 2. Animals received the same treatment in each period, either NaCl (n = 7), AEA (n = 7) or 2-AG (n = 6). Arrow indicates blood samples taken on day 8 of each treatment period. Star indicates end point analysis of brain tissue.

**Table S1.** Ingredients and chemical composition (means  $\pm$  SE) of the grass silage (GS) and corn silage (CS) based total mixed ration (TMR) of Experiment 1 and 2.

| Component                        | Experiment 1     |                 | Experiment 2     |
|----------------------------------|------------------|-----------------|------------------|
|                                  | GS               | CS              | CS               |
| Ingredient, g/kg of DM           |                  |                 |                  |
| Grass silage                     | 464.9 $\pm$ 18.1 |                 |                  |
| Corn silage                      |                  | 570.9 $\pm$ 7.3 | 558.3            |
| Barley straw                     |                  | 57.7 $\pm$ 13.9 | 85.4             |
| Grass hey                        | 131.9 $\pm$ 17.1 |                 |                  |
| Corn, ground                     | 114.9 $\pm$ 18.9 | 78.7 $\pm$ 11.0 | 56.8             |
| Wheat, ground                    | 116.5 $\pm$ 1.5  | 44.4 $\pm$ 0.5  | 43.6             |
| Extracted soy meal               |                  | 95.8 $\pm$ 5.2  | 106.0            |
| Extracted rapeseed meal          |                  | 134.8 $\pm$ 1.7 | 132.5            |
| Concentrate <sup>1</sup>         | 114.4 $\pm$ 5.1  |                 |                  |
| Mineral/vitamin mix <sup>2</sup> | 7.4 $\pm$ 0.1    | 9.9 $\pm$ 0.1   | 9.7              |
| Lime stone powder <sup>3</sup>   |                  | 5.1 $\pm$ 0.1   | 5.0              |
| Animal feed salt <sup>4</sup>    |                  | 2.7 $\pm$ 0.0   | 2.7              |
| Chemical analysis, g/kg of DM    |                  |                 |                  |
| Crude ash                        | 76.4 $\pm$ 2.1   | 40.6 $\pm$ 2.3  | 37.0 $\pm$ 4.0   |
| Crude protein                    | 161.6 $\pm$ 3.9  | 158.0 $\pm$ 3.5 | 159.5 $\pm$ 9.5  |
| Crude fiber                      | 190.8 $\pm$ 7.9  | 164.0 $\pm$ 2.3 | 161.5 $\pm$ 4.5  |
| Crude fat                        | 28.0 $\pm$ 1.4   | 34.0 $\pm$ 0.7  | 35.5 $\pm$ 0.5   |
| Starch                           | 184.2 $\pm$ 20.4 | 298.0 $\pm$ 7.3 | 315.5 $\pm$ 1.5  |
| aNDFom                           | 471.4 $\pm$ 17.3 | 385.4 $\pm$ 5.3 | 378.5 $\pm$ 13.5 |
| ADFom                            | 235.2 $\pm$ 11.1 | 198.8 $\pm$ 3.5 | 191.5 $\pm$ 5.5  |
| ME (MJ/kg of DM) <sup>5</sup>    | 10.7 $\pm$ 0.2   | 11.5 $\pm$ 0.1  | 11.6 $\pm$ 0.1   |
| NEL (MJ/kg of DM) <sup>5</sup>   | 6.5 $\pm$ 0.1    | 7.0 $\pm$ 0.1   | 7.1 $\pm$ 0.1    |

<sup>1</sup>MF 2000 (Ceravis AG, Regensburg, Germany): 30% extracted soy meal from peeled and steam-heated beans, 25.4% corn grit, 15% malt culms, 6.9% extracted rapeseed meal, 5.1% wheat, 5% sugar beet pulp, 4.9% dried grain pulp, 4.1% beet molasses, 2% NaHCO<sub>3</sub>, 1% CaCO<sub>3</sub>, 0.2% NaCl. Additives per kg original substance: 10,000 IU vitamin A, 1125 IU vitamin D<sub>3</sub>, 40 mg vitamin E, 0.6 mg I, 0.4 mg Co, 50 mg Mn, 75 mg Zn, 0.4 mg Se. Composition: 24% CP, 2.6% crude fat, 5.1% crude fiber, 8% crude ash, 0.73% Ca, 0.5% P, 0.65% Na, 7.1 MJ NEL/kg.

<sup>2</sup>Panto®-Mineral R 8609 (HL Hamburger Leistungsfuttermittel GmbH, Hamburg, Germany): 32.8% CaNaPO<sub>3</sub>, 19.3% CaMg (CO<sub>3</sub>)<sub>2</sub>, 16.7% NaCl, 15.3% CaCO<sub>3</sub>, 6.1% MgO, 3% sugar cane molasses.

Additives per kg original substance: 900,000 IU vitamin A, 200,000 IU vitamin D<sub>3</sub>, 4.5 g vitamin E, 1.5 g Cu, 8 g Zn, 5 g Mn, 60 mg I, 70 mg Co, 50 mg Se. Composition: 20% Ca, 6% P, 8% Na, 6% Mg.

<sup>3</sup>Kreidekalk (Spezialfutter Neuruppin GmbH und Co.KG): CaCO<sub>3</sub>. Composition: 37% Ca.

<sup>4</sup>ESCO Viehsalz (esco - european salt company GmbH, Hannover, Germany) Composition: 99% NaCl, 0.3% Ca, 0.01% Mg, <2 mg/kg Cu, < 2 mg/kg Zn

<sup>5</sup>ME and NEL content of TMR were calculated according to the recommendations of the German Society of Nutrition Physiology (GfE).

**Table S2.** Primer sequences

| Gene   |     | Primer sequence (5' to 3')    | Accession no.  | bp <sup>1</sup> | Efficiency        |
|--------|-----|-------------------------------|----------------|-----------------|-------------------|
| AGRP   | fw  |                               |                |                 |                   |
|        | d   | ACCGTCGCTGAAGAGGATAA          | NM_173983.2    | 214             | 1.87 <sup>a</sup> |
|        | rev | GCAGAAGGCGTTGAAGAAAC          |                |                 | 1.84 <sup>p</sup> |
| CNR1   | fw  | AAGCCCG-                      |                |                 |                   |
|        | d   | CATGGACATTCGGCTGG             | NM_001242341.2 | 79              | 1.91 <sup>a</sup> |
|        | rev | AGCAGAGGGCCCCAGCAGAT          |                |                 | 1.86 <sup>p</sup> |
| DAGLA  | fw  |                               |                | 107             |                   |
|        | d   | GGCTCAAAGTGTTCTCTGC           | NM_001192583.3 |                 | 1.85 <sup>a</sup> |
|        | rev | CACAATGTCCAGGTCTCGGA          |                |                 | 1.86 <sup>p</sup> |
| EIE3K  | fw  | CCAGGCCCACCAAGAAGAA           | NM_001034489   | 125             |                   |
|        | d   |                               |                |                 | 1.85 <sup>a</sup> |
|        | rev | TTATACCTTCCAGGAGGTCCATGT      |                |                 | 1.81 <sup>p</sup> |
| FAAH   | fw  |                               |                |                 |                   |
|        | d   | TTCCTGCCAAGCAACATACCT         | NM_001099102.2 | 105             | 1.85 <sup>a</sup> |
|        | rev | CACGAAATCACCTTT-<br>GAAGTTCTG |                |                 | 1.89 <sup>p</sup> |
| MGLL   | fw  | GCAACCAGCTGCTCAACAC           | NM_001206681.1 | 154             |                   |
|        | d   |                               |                |                 | --                |
|        | rev | AGCGTCTTGTCTGCTCTT            |                |                 | --                |
| NAAA   | fw  |                               |                |                 |                   |
|        | d   | CAGCACTACGACCGGGACTT          | NM_001100369   | 100             | --                |
|        | rev | CCGGGACGACTTTTCTGATC          |                |                 | --                |
| NAPEPL | fw  |                               |                |                 |                   |
|        | d   | AGAGATCACAGCAGCGTTCCAT        | NM_001015680.1 | 95              | 1.92 <sup>a</sup> |
|        | rev | ACTCCAGCTTCTTCAGGGTCATC       |                |                 | 1.92 <sup>p</sup> |
| NPY    | fw  |                               |                |                 |                   |
|        | d   | GTACCCCTCCAAGCCTGAC           | NM_001014845.3 | 191             | 1.84 <sup>a</sup> |
|        | rev | CCAGCCTAGTTCTGGGAATG          |                |                 | --                |
| PLAAT5 | fw  |                               |                |                 |                   |
|        | d   | AAGATCATCCAGCGGACAAAA         | NM_001281908.2 | 100             | 1.86 <sup>a</sup> |
|        | rev | CGCCGTATCTCAGGTCATTGA         |                |                 | 1.86 <sup>p</sup> |

|         |     |                         |              |     |                   |
|---------|-----|-------------------------|--------------|-----|-------------------|
| PLA2G4E | fw  |                         |              |     |                   |
|         | d   | AGGGCCTTTGTCTCCAAGTT    | XM_024998182 | 170 | --                |
|         | rev | ACAAAGAATGCGGTGTCCAG    |              |     | --                |
| PPIA    | fw  | GGATTTATGTGCCAGGGTGGTGA | NM_178320    |     |                   |
|         | d   |                         |              | 120 | 1.92 <sup>a</sup> |
|         | rev | CAAGATGCCAGGACCTGTATG   |              |     | 1.89 <sup>p</sup> |

<sup>1</sup> Product size (base pairs)

<sup>a</sup> Arcuate nucleus (ARC), <sup>p</sup> Paraventricular nucleus (PVN)

-- Due to insufficient amount of amplicon products ( $C_t > 30$ ), the efficiency could not be calculated.

AGRP, agouti related neuropeptide; CNR1, cannabinoid receptor 1; DAGLA, diacylglycerol lipase alpha; EIE3K, eukaryotic translation initiation factor 3 subunit K; FAAH, fatty acid amide hydrolase; MGLL, monoglyceride lipase; NAAA, N-acylethanolamine acid amidase; NAPEPLD, N-acyl phosphatidylethanolamine phospholipase D; NPY, neuropeptide Y; PLA2G4E, phospholipase A2 group IVE; PLAAT5, phospholipase A and acyltransferase 5; PPIA, Peptidylprolyl isomerase A

**Table S3.** ANOVA of the effects of treatment, diet, housing and their interactions using the MIXED procedure in SAS (SAS Institute, Cary, NC, USA)

|                                                                      | Treatment                      | Diet                           | Time                              | Treatment x diet               | Treatment x time                 | Diet x time                     | Treatment x diet x time          |
|----------------------------------------------------------------------|--------------------------------|--------------------------------|-----------------------------------|--------------------------------|----------------------------------|---------------------------------|----------------------------------|
| Fig. 1A (DMI/BW <sup>0.75</sup> (kg/kg <sup>0.75</sup> ))            | $F(2,36) = 7.73$<br>$P < 0.01$ | $F(1,30) = 0.03$<br>$P = 0.87$ | $F(6,106) = 73.3$<br>$P < 0.001$  | $F(2,30) = 0.26$<br>$P = 0.78$ | $F(12,106) = 1.85$<br>$P < 0.05$ | $F(6,113) = 1.50$<br>$P = 0.18$ | $F(12,113) = 0.65$<br>$P = 0.80$ |
| Fig. 1B (cumulative DMI/BW <sup>0.75</sup> (kg/kg <sup>0.75</sup> )) | $F(2,28) = 4.10$<br>$P < 0.05$ | $F(1,39) = 1.93$<br>$P = 0.17$ | $F(6,88) = 221.09$<br>$P < 0.001$ | $F(2,39) = 0.08$<br>$P = 0.92$ | $F(12,88) = 2.83$<br>$P < 0.01$  | $F(6,136) = 2.53$<br>$P < 0.05$ | $F(12,136) = 0.64$<br>$P = 0.80$ |
|                                                                      | Treatment                      | Diet                           | Time                              | Treatment x diet               | Treatment x time                 | Diet x time                     | Treatment x diet x time          |
| Fig. 2A (Plasma AEA (nM))                                            | $F(2,29) = 0.96$<br>$P = 0.40$ | $F(1,37) = 0.21$<br>$P = 0.65$ | $F(2,40) = 3.41$<br>$P < 0.05$    | $F(2,37) = 0.82$<br>$P = 0.45$ | $F(4,40) = 4.29$<br>$P < 0.01$   | $F(2,75) = 1.52$<br>$P = 0.23$  | $F(4,75) = 0.33$<br>$P = 0.86$   |
| Fig. 2B (Plasma 2-AG (nM))                                           | $F(2,27) = 1.14$<br>$P = 0.34$ | $F(1,21) = 2.41$<br>$P = 0.14$ | $F(2,37) = 1.44$<br>$P = 0.25$    | $F(2,21) = 0.25$<br>$P = 0.78$ | $F(4,37) = 1.15$<br>$P = 0.35$   | $F(2,44) = 2.32$<br>$P = 0.11$  | $F(4,44) = 2.26$<br>$P = 0.08$   |
